# Supplementary material for: Constitution of a visual detection system for lead(ii) on polydiacetylene–glycine embedded nanofibrous membranes
Source: Royal Society of Chemistry journal article supplement (doi:10.1039/c5ta00608b), 2015-01-01
Supplement: c5ta00608b1.pdf [file c5ta00608b1.pdf]

# Constituting Visually Detection System for Lead(II) on Polydiacetylene-Glycine Embedded Nanofibrous Membranes

*Yan Li<sup>a</sup>, Lihuan Wang<sup>a</sup>, Yanan Wen<sup>a</sup>, Bin Ding<sup>a, b\*</sup>, Gang Sun<sup>b</sup>, Tao Ke<sup>c</sup>,  
Jingyuan Chen<sup>c</sup>, and Jianyong Yu<sup>a</sup>*

<sup>a</sup> Key Laboratory of Textile Science & Technology, Ministry of Education, College of Textiles, Donghua University, Shanghai 201620, China

<sup>b</sup> Nanomaterials Research Center, Modern Textile Institute, Donghua University, Shanghai 200051, China

<sup>c</sup> Department of Occupational and Environmental Health, School of Public Health, Fourth Military Medical University, Xi'an, Shanxi 710032, China

\* Corresponding author at: Key Laboratory of Textile Science & Technology, Ministry of Education, College of Textiles, Donghua University, Shanghai 201620, China.

Fax: +86 21 62378392.

*E-mail:* binding@dhu.edu.cn (B. Ding)

## Experiment

### Assembly of PDA-Gly Liposomes

By dissolving the as-prepared PCDA-Gly in a small amount of  $\text{CHCl}_3$  (10 mL). Then remove the solvent under a  $\text{N}_2$  stream. After the addition of 5 mM HEPES buffer at pH 7.4 (10 mL), the mixture was sonicated at  $80^\circ\text{C}$  for 30 min. The final concentration of PCDA-Gly in the resulting solution was 1.0 mM. Irradiation of the solution for 1 min at 254 nm using a hand-held UV lamp provided solutions of PDA-Gly. The liposomes solution was then stored at  $4^\circ\text{C}$  overnight before use.

### Lead(II) detection using PDA-Gly liposomes

To confirm the colorimetric response of PDA-Gly liposomes to  $\text{Pb}^{2+}$ , a series of  $\text{Pb}^{2+}$  solution with different concentration were introduced into the 1 mM PDA-Gly liposomes solution. After 20 min of incubation, optical images were obtained and UV-vis adsorption spectra were taken from Ideaoptics PG 2000+ fiber optic spectrometer.

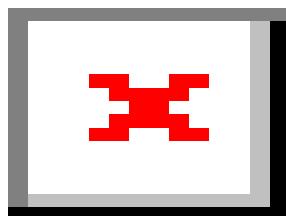

**Fig. S1.**  $^1\text{H}$  NMR of PCDA-Gly in  $\text{CDCl}_3$ .

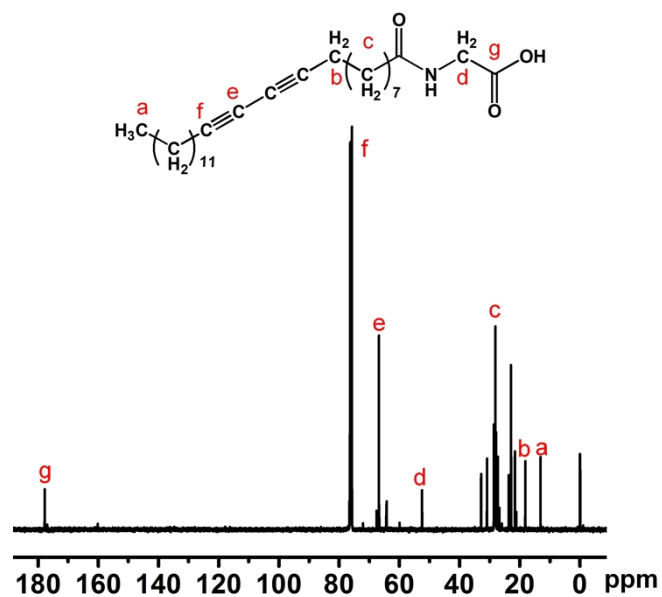

Fig. S2.  $^{13}\text{C}$  NMR of PCDA-Gly in  $\text{CDCl}_3$ .

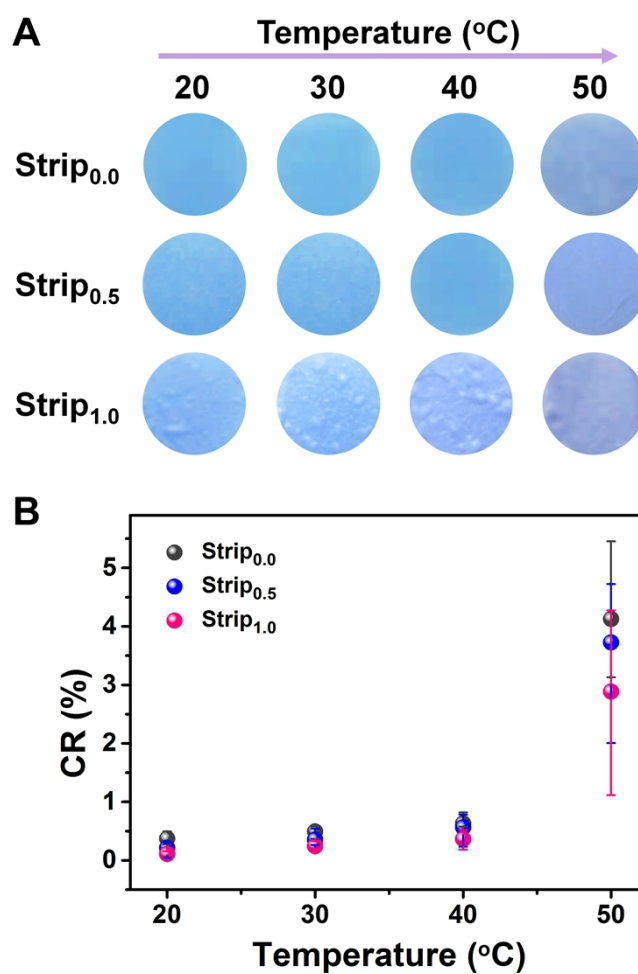

Fig. S3. (A) The optical images of three types of strips from left to right display the

color changes caused by temperature, upon heating from 20 to 50 °C. (B) The corresponding CR% of strips at each temperature point.

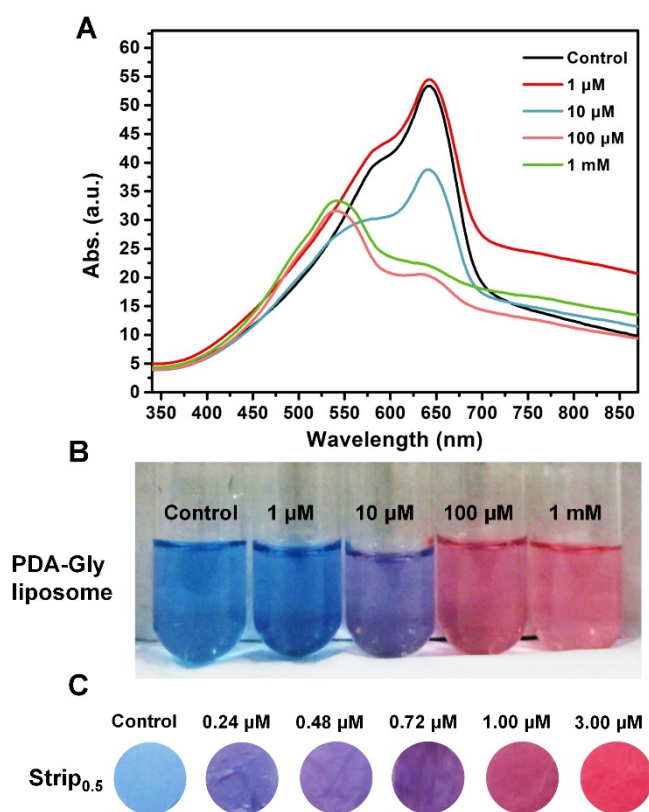

**Fig. S4.** UV-vis spectra (A) and photographs (B) illustrating the colorimetric response of PDA-Cly liposomes. Photographs (C) illustrating the colorimetric response of PAN NFM based strips

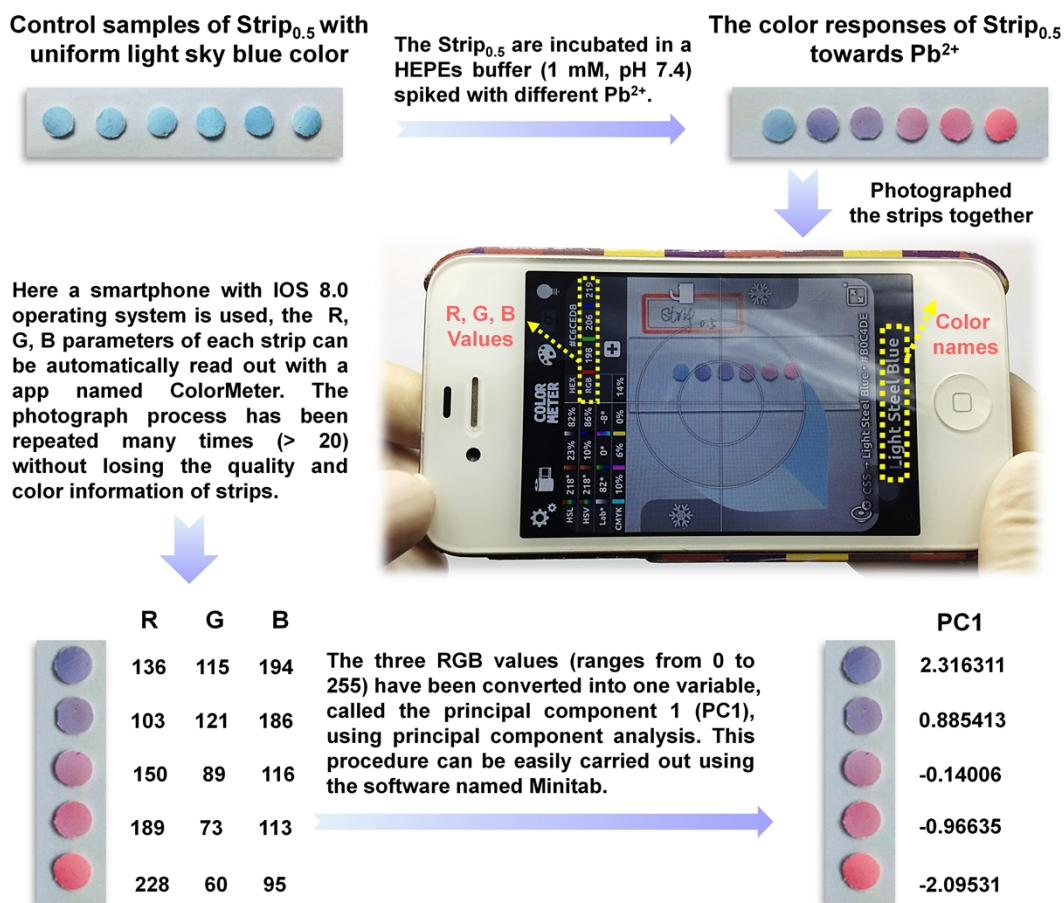

**Fig. S5.** Schematic a reprehensive procedure used to calculate principle component by a scalable RGB technique under the assistance of a smartphone.

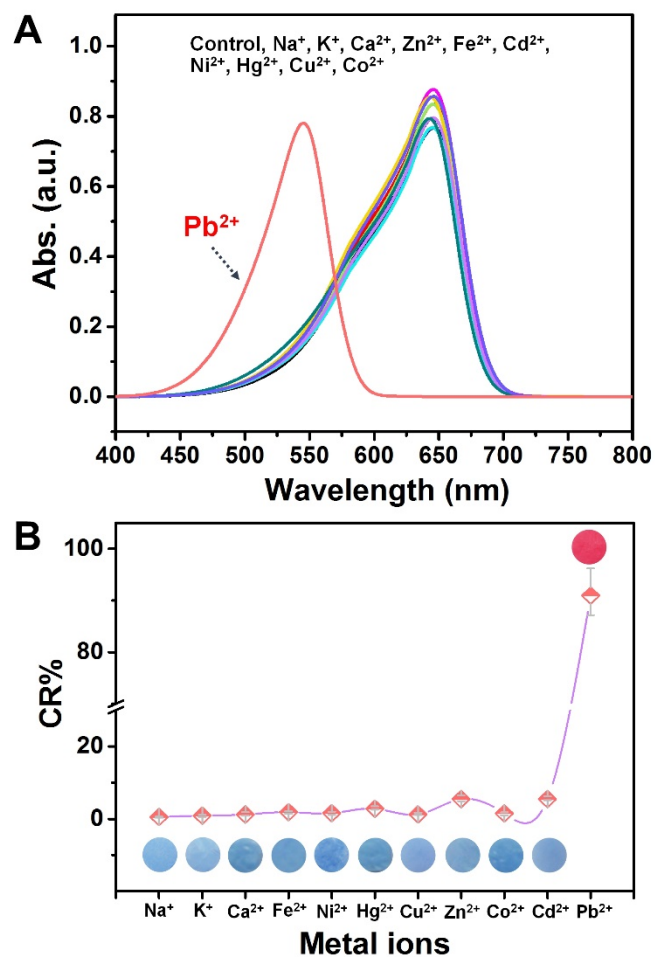

**Fig. S6.** (A) UV-vis spectra and (B) CR % of strip<sub>0.5</sub> in the presence of Pb<sup>2+</sup> (3 μM) and various other metal ions (30 μM), including Na<sup>+</sup>, K<sup>+</sup>, Ca<sup>2+</sup>, Fe<sup>2+</sup>, Ni<sup>2+</sup>, Hg<sup>2+</sup>, Cu<sup>2+</sup>, Zn<sup>2+</sup>, Co<sup>2+</sup>, and Cd<sup>2+</sup> in HEPES buffer. Insets show the corresponding color change photographs.

**Table S1.** RGB parameters obtained from the digital pictures of sensory strip cut from the sensory membranes.

| [Pb <sup>2+</sup> ]<br>( $\mu$ M) | Membrane            |     |     |                       |     |     |                     |     |     |
|-----------------------------------|---------------------|-----|-----|-----------------------|-----|-----|---------------------|-----|-----|
|                                   | 0% SiO <sub>2</sub> |     |     | 0.5% SiO <sub>2</sub> |     |     | 1% SiO <sub>2</sub> |     |     |
|                                   | R                   | G   | B   | R                     | G   | B   | R                   | G   | B   |
| <b>0.24</b>                       | 113                 | 155 | 205 | 103                   | 121 | 186 | 82                  | 118 | 209 |
| <b>0.48</b>                       | 126                 | 132 | 188 | 121                   | 102 | 139 | 58                  | 94  | 172 |
| <b>0.72</b>                       | 151                 | 127 | 182 | 150                   | 89  | 116 | 61                  | 85  | 167 |
| <b>1.00</b>                       | 168                 | 112 | 177 | 179                   | 73  | 110 | 60                  | 83  | 165 |
| <b>3.00</b>                       | 172                 | 108 | 175 | 228                   | 60  | 95  | 55                  | 66  | 168 |

**Table S2.** Principal component analysis.

| Component  | Membrane            |       |              |                       |       |              |                     |       |              |
|------------|---------------------|-------|--------------|-----------------------|-------|--------------|---------------------|-------|--------------|
|            | 0% SiO <sub>2</sub> |       |              | 0.5% SiO <sub>2</sub> |       |              | 1% SiO <sub>2</sub> |       |              |
|            | Eig                 | Var   | Cum          | Eig                   | Var   | Cum          | Eig                 | Var   | Cum          |
|            |                     | %     | %            |                       | %     | %            |                     | %     | %            |
| <b>PC1</b> | 2.9198              | 0.973 | <b>0.973</b> | 2.8733                | 0.958 | <b>0.958</b> | 2.8164              | 0.939 | <b>0.939</b> |
| <b>PC2</b> | 0.0657              | 0.022 | 0.995        | 0.1206                | 0.040 | 0.998        | 0.1433              | 0.048 | 0.987        |
| <b>PC3</b> | 0.0145              | 0.005 | 1.000        | 0.0061                | 0.002 | 1.000        | 0.0403              | 0.013 | 1.000        |

**Table S3.** Component weights.

| Variable | Membrane            |                       |                     |
|----------|---------------------|-----------------------|---------------------|
|          | 0% SiO <sub>2</sub> | 0.5% SiO <sub>2</sub> | 1% SiO <sub>2</sub> |
|          | PC1                 | PC1                   | PC1                 |
| <b>R</b> | -0.572593           | -0.573567             | 0.585673            |
| <b>G</b> | 0.581445            | 0.588588              | 0.566867            |
| <b>B</b> | 0.577978            | 0.569724              | 0.579352            |

**Table S4.** Principal components (PC1).

| [Pb <sup>2+</sup> ]<br>( $\mu$ M) | Membrane            |                       |                     |
|-----------------------------------|---------------------|-----------------------|---------------------|
|                                   | 0% SiO <sub>2</sub> | 0.5% SiO <sub>2</sub> | 1% SiO <sub>2</sub> |
| <b>0.24</b>                       | 2.54869             | 2.31631               | 2.90856             |
| <b>0.48</b>                       | 0.72950             | 0.88541               | -0.27151            |
| <b>0.72</b>                       | -0.26753            | -0.14006              | -0.53289            |
| <b>1.00</b>                       | -1.35082            | -0.96635              | -0.70955            |
| <b>3.00</b>                       | -1.65985            | -2.09531              | -1.39461            |
